# Supplementary material for: The Dynamic of Polyphenols Concentrations in Organic and Conventional Sour Cherry Fruits: Results of a 4-Year Field Study
Source: MDPI journal article supplement (doi:10.3390/molecules25163729), 2020-08-15
Supplement: s1 [file s1]

Table S1, The data about soil and orchards conditions as well fertilization and plant protection in time of sour cherry cultivation in four years of experiment

|                                    | Organic orchard              | Conventional orchard         |
|------------------------------------|------------------------------|------------------------------|
| type of soil                       | podzolic soil overlying clay | podzolic soil overlying clay |
| % humus content                    | 1.36%                        | 1.72%                        |
| pH                                 | 6.70                         | 6.45                         |
| fertilization (dose in kg or t/ha) | Tables 2A-3A                 | Tables 4A-5A                 |
| spacing of trees                   | 4.2 x 2.5 m                  | 4.2 x 2.5 m                  |
| plant protection                   | Table 3A and 5A              | Table 2A and 4A              |

Table S2 Fertilization regime in conventional orchard in experimental time  
2016-2018

| Data               | kind of fertilizer           | dose of fertilizer |
|--------------------|------------------------------|--------------------|
| 18 of May 2016     | Krista Leaf Fruit controller | 3 kg/ha            |
|                    | Magnesium sulphate           | 1% (600 l/ha)      |
|                    | Urea                         | 0.5% (600 l/ha)    |
| 3 of June 2016     | Urea                         | 0.5% (600 l/ha)    |
|                    |                              |                    |
| 28 of April 2017   | Amonium nitrate              | 100 lg/ha          |
| 19 of May 2017     | Magnesium sulphate           | 1% (600 l/ha)      |
|                    | Urea                         | 0.5% (600 l/ha)    |
| 5 of November 2017 | Radkovit calcium carbonate   | 1.5 t/ha           |
|                    |                              |                    |
| 18 of April 2018   | Urea                         | 0.5% (600 l/ha)    |
| 19 of April 2018   | Ammonium nitrate             | 100 kg/ha          |
| 9 of May 2018      | Magnesium sulphate           | 1% (600 l/ha)      |
|                    | Urea                         | 0.5% (600 l/ha)    |
| 21 of May 2018     | Urea                         | 0.5% (600 l/ha)    |
| 24 of May 2018     | Urea                         | 0.5% (600 l/ha)    |

Table S3 Fertilization regime in organic orchard in experimental time  
2016-2018

| <b>Data</b>              | <b>kind of fertilizer</b>               | <b>dose of fertilizer</b> |
|--------------------------|-----------------------------------------|---------------------------|
| 5 of May-14 of June 2016 | cow slurry                              | 10 m <sup>3</sup> /ha     |
|                          |                                         |                           |
| 25 of May 2017           | cow slurry                              | 10 m <sup>3</sup> /ha     |
|                          |                                         |                           |
| 4-17 of April 2018       | cow manure                              | 30 t/ha                   |
| 20 of April 2018         | Efective Microorganisms<br>(Farma Plus) | 20 l/ha                   |

Table S4 Plant protection regime in conventional orchard in experimental time 2015-2018

| Data                | kind of pesticide     | dose of pesticide | reason                                          |
|---------------------|-----------------------|-------------------|-------------------------------------------------|
| 19 of April 2015    | Rovlar aquaflo 500 SC | 1.25 l/ha         | brown rot                                       |
| 25 of May 2015      | Syllit 65 WP          | 1.5 kg/ha         | leaf spot of stone trees                        |
| 14 of June 2015     | Merpan 80 WG          | 1.9 kg/ha         | leaf spot of stone trees, bitter rot            |
| 28 of June 2015     | Mospilan 20 SP        | 0.2 ka/ha         | cherry fruit fly, aphids                        |
| 15 of July 2015     | Kaptan Plus 71.5 WP   | 2 kg/ha           | brown rot, leaf spot of stone trees, bitter rot |
|                     |                       |                   |                                                 |
| 23 of April 2016    | Rovlar aquaflo 500 SC | 1.25 l/ha         | brown rot                                       |
| 18 of May 2016      | Syllit 65 WP          | 1.5 kg/ha         | leaf spot of stone trees                        |
| 3 of June 2016      | Merpan 80 WG          | 1.9 kg/ha         | leaf spot of stone trees, bitter rot            |
|                     | Mospilan 20 SP        | 0.2 ka/ha         | cherry fruit fly, aphids                        |
| 27 of June 2016     | Kaptan Plus 71.5 WP   | 2 kg/ha           | brown rot, leaf spot of stone trees, bitter rot |
|                     |                       |                   |                                                 |
| 28 of March 2017    | Cuprate Extra 350 SC  | 3 l/ha            | brown rot, leaf spot of stone trees, bitter rot |
| 29 of April 2017    | Rovlar aquaflo 500 SC | 1.25 l/ha         | brown rot                                       |
| 19 of May 2017      | Syllit 65 WP          | 1.2 kg/ha         | leaf spot of stone trees                        |
|                     | Calypso               | 0.2 l/ha          | cherry fruit fly, aphids                        |
|                     | Kaptan Plus           | 2 kg/ha           | brown rot, leaf spot of stone trees, bitter rot |
| 9 of June 2017      | Decis Mega            | 0.25 l/ha         | cherry fruit fly, aphids                        |
|                     | Merpan 80 WG          | 1.9 kg/ha         | leaf spot of stone trees, bitter rot            |
| 22 of June 2017     | Decis Mega            | 0.25 l/ha         | cherry fruit fly, aphids                        |
|                     | Syllit 65 WP          | 1.2 kg/ha         | leaf spot of stone trees                        |
| 3 of August 2017    | Cuprate Extra 350 SC  | 3 l/ha            | brown rot, leaf spot of stone trees, bitter rot |
| 7 of November 2017  | Cuprate Extra 350 SC  | 3 l/ha            | brown rot, leaf spot of stone trees, bitter rot |
| 21 of November 2017 | Cuprate Extra 350 SC  | 3 l/ha            | brown rot, leaf spot of stone trees, bitter rot |
|                     |                       |                   |                                                 |
| 11 of April 2018    | Cuprate Extra 350 SC  | 3 l/ha            | brown rot, leaf spot of stone trees, bitter rot |
| 18 of April 2018    | Signum                | 0.75 kg/ha        | brown rot                                       |
| 9 of May 2018       | Syllit 65 WP          | 1.2 kg/ha         | leaf spot of stone trees                        |
|                     | Teppeki               | 0.14 kg/ha        | aphids                                          |
| 21 of May 2018      | Kaptan Plus           | 2 kg/ha           | leaf spot of stone trees, bitter rot            |
| 24 of May 2018      | Calypso               | 0.2 l/ha          | cherry fruit fly, aphids                        |
| 30 of May 2018      | Switch                | 0.6 kg/ha         | brown rot                                       |
|                     | Decis Mega            | 0.25 l/ha         | cherry fruit fly, aphids                        |
| 8 of June 2018      | Decis Mega            | 0.25 l/ha         | cherry fruit fly, aphids                        |
| 14 of August 2018   | Syllit 65 WP          | 1.5 kg/ha         | leaf spot of stone trees                        |
| 7 of November 2018  | Cuprate Extra 350 SC  | 3 l/ha            | brown rot, leaf spot of stone trees, bitter rot |

Table S5 Plant protection regime in conventional orchard in experimental time 2015-2018

| Data               | kind of pesticide                    | dose of pesticide | reason                                                         |
|--------------------|--------------------------------------|-------------------|----------------------------------------------------------------|
| 20 of April 2015   | Cuprate Extra 350 SC                 | 3 l/ha            | brown rot, leaf spot of stone trees, bitter rot                |
| 10 of June 2015    | garden soap K + methylated spirits   | 15 l/ha + 15 l/ha | aphids                                                         |
| 15 of June 2015    | garden soap K + methylated spirits   | 15 l/ha + 15 l/ha | aphids                                                         |
| 10 of July 2015    | garden soap K + methylated spirits   | 15 l/ha + 15 l/ha | aphids                                                         |
| 16 of July 2015    | garden soap K + methylated spirits   | 15 l/ha + 15 l/ha | aphids                                                         |
| 21 of July 2015    | garden soap K + methylated spirits   | 15 l/ha + 15 l/ha | aphids                                                         |
| 9 of August 2015   | garden soap K + methylated spirits   | 15 l/ha + 15 l/ha | aphids                                                         |
|                    |                                      |                   |                                                                |
| 23 of April 2016   | Cuprate Extra 350 SC                 | 3 l/ha            | brown rot, leaf spot of stone trees, bitter rot                |
| 12 of June 2016    | garden soap K + methylated spirits   | 15 l/ha + 15 l/ha | aphids                                                         |
| 19 of June 2016    | garden soap K + methylated spirits   | 15 l/ha + 15 l/ha | aphids                                                         |
| 27 of June 2016    | garden soap K + methylated spirits   | 15 l/ha + 15 l/ha | aphids                                                         |
| 8 of July 2016     | garden soap K + methylated spirits   | 15 l/ha + 15 l/ha | aphids                                                         |
| 17 of July 2016    | garden soap K + methylated spirits   | 15 l/ha + 15 l/ha | aphids                                                         |
| 22 of July 2016    | garden soap K + methylated spirits   | 15 l/ha + 15 l/ha | aphids                                                         |
| 8 of August 2016   | garden soap K + methylated spirits   | 15 l/ha + 15 l/ha | aphids                                                         |
|                    |                                      |                   |                                                                |
| 3 of March 2017    | Cuprate Extra 350 SC                 | 3 l/ha            | brown rot, leaf spot of stone trees, bitter rot                |
| 30 of March 2017   | Cuprate Extra 350 SC                 | 1.5 l/ha          | brown rot, leaf spot of stone trees, bitter rot                |
| 4 of August 2017   | Cuprate Extra 350 SC                 | 1.5 l/ha          | brown rot, leaf spot of stone trees, bitter rot                |
|                    |                                      |                   |                                                                |
| 26 of March 2018   | Cuprate Extra 350 SC                 | 1,5 l/ha          | brown rot, leaf spot of stone trees, bitter rot                |
| 12 of April 2018   | Cuprate Extra 350 SC                 | 1,5 l/ha          | brown rot, leaf spot of stone trees, bitter rot                |
| 20 of April 2018   | Efective Microorganisms (Farma Plus) | 20 l/ha           | brown rot, leaf spot of stone trees, bitter rot, plant feeding |
| 21 of May 2018     | Cuprate Extra 350 SC                 | 1,5 kg/ha         | brown rot, leaf spot of stone trees, bitter rot                |
| 5 of December 2018 | Cuprate Extra 350 SC                 | 1,5 kg/ha         | brown rot, leaf spot of stone trees, bitter rot                |

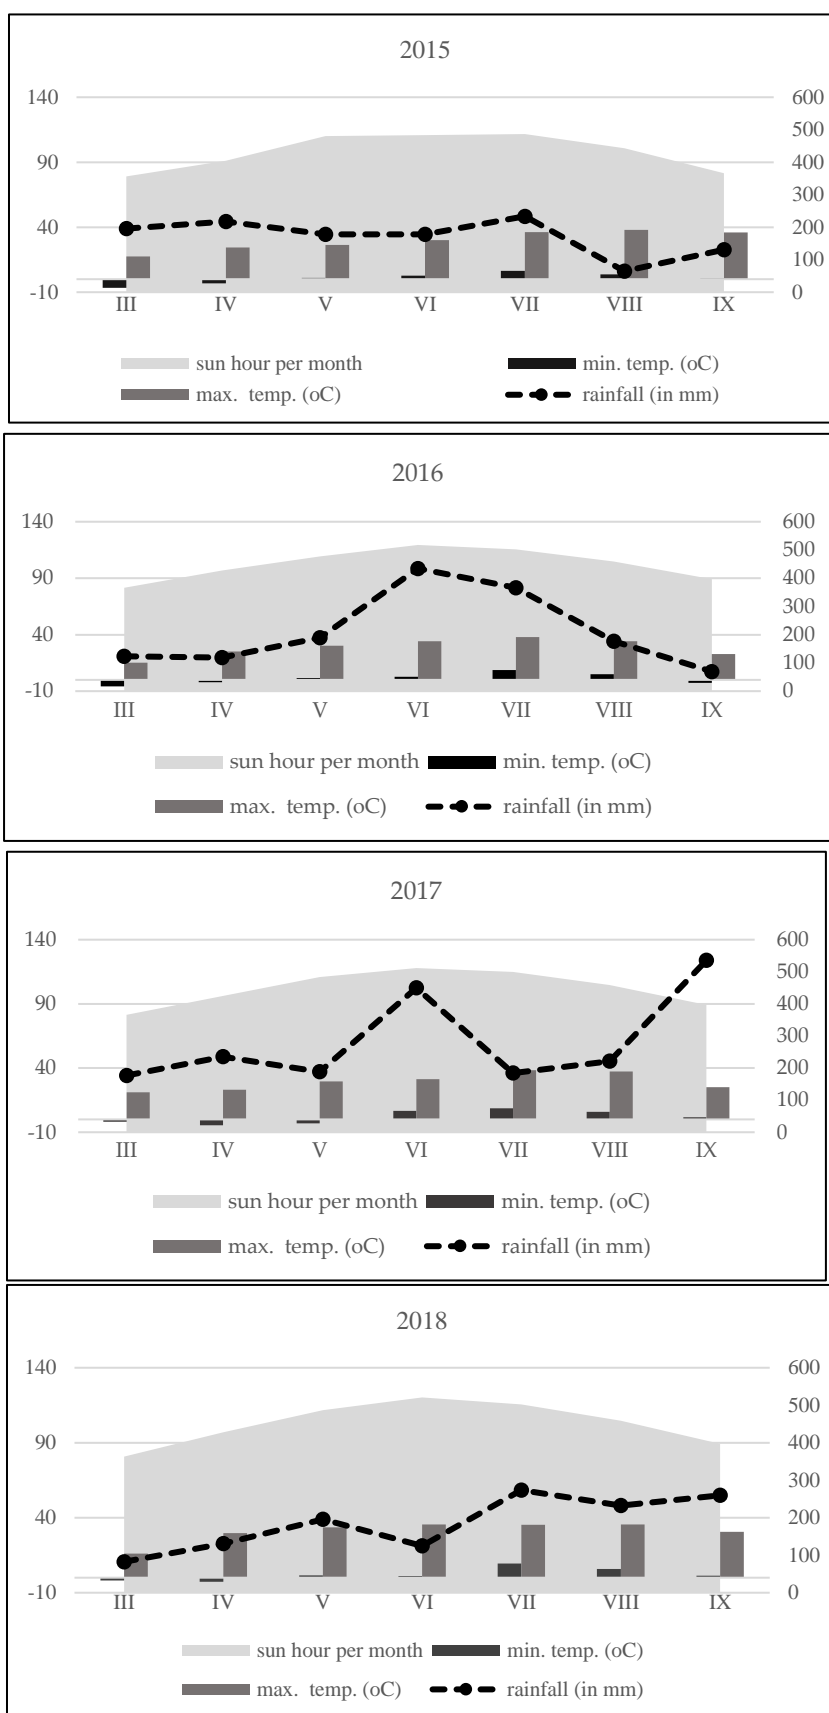

Figure S1. Weather condition in four year of experiment with sour cherry cultivars in organic and conventional orchards
